# Supplementary material for: Telitacicept plus low-dose mycophenolate mofetil in the treatment of IgA nephropathy: a retrospective study
Source: Research Square preprint supplement (doi:10.21203/rs.3.rs-6836894/v1), 2025-06-18
Supplement: Supplementary file 1 [file a24a7332dd21784e704814bb.xlsx]

## Sheet: Sheet1
	Proteinuria (g/24 h)	Patients
		P1	P2	P3	P4	P5	P6	P7	P8	P9	P10	P11	P12	P13	P14	P15	P16	P17	P18	P19	P20	P21	P22	P23	P24
	Time (months)
	0	1.84	2	17.94	6.76	1.2	2	1.74	13.4	1.02	2.66	2.94	3.16	6.66	2.1	6.55	0.78	7.9	3.34	0.87	1	1.38	3.49	2.4	17.18
	3	1.21	1.8	10.8	1.4	0.6	1.1	0.4	6.7	0.7	1.6	2.1	0.8	1.8	0.7	4.1	0.51	3.6	1.4	0.3	0.8	1.5	1.6	1.8	8.1
	6	0.72	1.28	6.7	0.23	0.27	0.99	0.06	2.79	0.21	0.47	0.43	0.15	0.2	0.91	2.8	0.18	0.28	0.82	0.54	0.45	0.29	0.9	1.02	3.59
	9	0.85	0.92	1.34	0.4	0.28	0.6	0.12	0.65	0.3	0.28	0.71	0.15	0.22	0.72	1.2	0.16	0.36	1.11	0.48	0.15	0.4	0.69	0.8
	12	0.47	0.08	1.8	1.01	0.09	0.9	0.06	2.79	0.21	0.1	0.64	0.12	0.15	0.66	2.3	0.19	0.3	0.8	0.29	0.2	0.64	0.3	0.92
	15	0.2	0.1	2.3	0.6	0.21	0.23	0.06	3.01	0.12	0.2	0.55	0.14	0.22	0.41	1.1	0.2	0.24	1.2	0.39	0.16	0.5	0.1	1.08
	18	0.13	0.3	2.8	0.3	0.18	0.74	0.06	1.97	0.18	0.06	0.24	0.16	0.1	0.04	0.03	0.3	0.11	1	0.3	0.15	0.16	0.4	1.53
	21	0.08	0.13		0.17	0.15	0.12	0.12	1.84	0.05	0.1	0.16	0.21	0.23	0.12	0	0.35	0.16	0.9	0.34	0.1	0.1	0.12	0.7
	24	0.1	0.06			0.12		0.05	2.85		0.13	0.1	0.2	0.11	0.07	0.3		0.11	0.6	0.21	0.15	0.2	0.61	1.6
	eGFR (mL/min/1.73m2)													Patients
		P1	P2	P3	P4	P5	P6	P7	P8	P9	P10	P11	P12	P13	P14	P15	P16	P17	P18	P19	P20	P21	P22	P23	P24
	Time (months)
	0	116.96	49.69	30.68	30.93	125.53	107.28	121.19	120.5	30.99	121.89	109.19	125.85	105.6	59.17	67.76	90.91	98.53	86.34	132.33	135.68	85.61	37.58	80.12	31.63
	3	121.3	50.9	31.42	32.4	128	106.2	125.7	112.45	35.76	124.5	112.4	128.2	102.26	65.9	76	95.68	104.58	95.2	135	138	90.3	41.36	83.2	34
	6	125.6	61.5	32.58	32.88	130.2	118.2	132.83	108.14	40.31	115.67	108.21	126	109.76	70.5	80.17	87	107	98.14	137.3	136.7	81.54	40.89	88.76	36.6
	9	120.2	62.17	32	36.8	125.6	120.5	129.46	98.2	43.18	110.4	101.63	121.96	105	76	82.1	89.32	96.3	103	131.56	133.12	88.57	48.1	76.43
	12	126	68.2	33.7	35	132.56	115.9	129.18	80.3	48.24	104.82	110.24	118	100.9	80.32	86.9	82.14	92.67	107.3	130	129.82	83	44.77	78
	15	116.36	66.82	35.31	37	119.03	119.6	130.7	69.2	52.63	108.12	107.26	125.36	102.1	83.8	82.4	86.23	88.43	120	129.3	125.1	76.12	50.34	69.4
	18	123.7	68.7	38.17	35.24	116.38	112.57	123.41	86.97	60	110.4	108	122.2	100.8	79.16	80.04	79.12	93.52	119.38	132.46	128	67.43	45.3	67.3
	21	125.2	72.16		40.7	121.56	102.45	125.6	92.82	61.3	98.09	103.4	121.87	111.54	89.68	90.23	72.3	90.4	120	136.43	130.69	62.5	46.31	71.34
	24	122.4	63.2			123.24		128.3	86.7		105.47	105.93	123.2	108.76	78.09	89.1		86.52	114.78	134.15	123.8	54.16	47.42	67.32
	Hematuria (/ μL)													Patients
		P1	P2	P3	P4	P5	P6	P7	P8	P9	P10	P11	P12	P13	P14	P15	P16	P17	P18	P19	P20	P21	P22	P23	P24
	Time (months)
	0	67	260	277.5	28.6	182	5.2	106	20	98	16.18	105.31	777.6	181.9	177	499.6	19	190.4	207.3	2.59	6	77	108	200.65	42.6
	3	45	128	109	0	56	0	12	1	21	46	201	109	10	10	201	10	103	98	0	0	89	31	86	21
	6	9	35	12	3	1	0	3	18	60	32	222	39	0.9	1	10	292	3	102.6	0	7	25	6	0	30
	9	0	12	20	1	0	0	0	0	24	8	68	11	0	0	3	36	0	26	0	0	0	0	0
	12	0	0	46	2	1.1	4	0	0	3	19	25.5	0	0	20	0	9	0	3.2	0	0	2.1	0	0
	15	2	9	16	0	13	5	1	0	0	2	0	11	3		0	0	31	0	8	12	0	3	0
	18	10	3	10	0	19.3	0	6	0	0	8	3	3	0	0	0	3	13	22	0	0	10	4	3
	21	3	0		0	2	0	0	2	8	0	0	0	4	3	6	3	0	41	0	0	29	0	0
	24	0	8			1.8		0	2		1	0	5	10	1.1	0		13	37.9	3	0	10	4	3
	Serum creatinine (μmol/L)													Patients
		P1	P2	P3	P4	P5	P6	P7	P8	P9	P10	P11	P12	P13	P14	P15	P16	P17	P18	P19	P20	P21	P22	P23	P24
	Time (months)
	0	78	143	237	210	57	50	48	88	204	60	63	63	88	109	101	78	70	47	62	40	100	154	105	223
	3	72	147	262	214	88	57	55	120	190	77	67	56	84	107	94	73	78	52	53	50	94	140	113	218
	6	87	50	210	189	80	61	40	122	167	78	54	66	81	97	89	92	90	62	53	58	116	135	92	230
	9	84	145	274	201	82	67	50	117	170	62	55	66	80	99	85	76	72	69	57	60	120	118	110
	12	72	150	251	231	75	59	52	122	162	73	59	59	79	89	79	84	69	66	53	63	114	124	143
	15	72	124	258	221	79	62	47	120	148	66	62	54	86	93	68	70	70	61	62	58	109	114	139
	18	69	120	240	230	80	51	45	103	115	60	64	51	95	85	79	87	80	72	70	57	117	120	120
	21	68	115		178	65	56	49	88	120	82	58	52	87	71	63	92	72	69	62	65	110	121	156
	24	66	125			63		52	103		70	60	48	76	79	76		80	70	62	57	128	124	145
	Lymphocytes counts (x109)													Patients
		P1	P2	P3	P4	P5	P6	P7	P8	P9	P10	P11	P12	P13	P14	P15	P16	P17	P18	P19	P20	P21	P22	P23	P24
	Time (months)
	0	2.98	1.37	1.64	0.95	2.11	1.37	2.22	2.13	1.65	2.16	2.8	2.26	1.93	2.34	1.47	1.44	2.3	2.94	1.89	1.79	1.74	1.55	2.31	1.8
	3	2.6	1.45	1.76	1.45	2.3	1.65	2.3	2.6	1.92	2.5	2.67	1.8	2.1	2.13	1.65	1.8	2.1	2.56	2.04	1.9	2.4	1.7	2.03	1.99
	6	1.6	0.93	1.02	1.8	2.6	1.91	2.1	3.94	2.97	3.97	3.87	0.98	2.75	1.54	1.78	1.44	2.56	2.63	2.18	2.19	2.53	1.53	2.1	2.3
	9	1.92	1.26	1.56	1.76	2.23	2.01	1.98	2.9	2.53	2.71	3.2	2.1	2.7	1.98	1.98	1.67	2.45	2.45	1.91	2.06	2.3	1.8	1.8
	12	1.91	1.34	1.12	1.83	2.05	1.79	2.4	3.32	2.1	3.12	2.64	1.9	2.01	1.7	2.3	2	2.4	2.1	2.01	1.7	2.13	1.96	2.01
	15	2.08	1.45	1.64	2.01	1.98	1.8	1.98	3.1	1.8	2.7	2.34	2.14	2.15	2.13	2.4	1.87	2.06	1.8	1.9	1.96	2.8	1.79	1.97
	18	2.14	1.53	1.8	1.6	1.6	2.12	2.12	4.04	2.34	2.42	2.32	2.35	2.31	2.1	1.65	1.96	2.6	1.93	1.86	1.8	1.9	1.17	2.23
	21	2.3	1.27		1.91	2.13	2.3	2.3	1.71	2.62	2.16	2.01	2.06	1.98	1.08		2.03	2.3	1.78	2.4	1.67	2.6	1.8	2.2
	24	1.98	1.5			2.4		2.17	4.38		2.5	1.96	1.89	1.61	0.95			2.6	1.43	2.6	1.8	2.1	1.95	2.01
